# Supplementary material
Source: PubMed Central journal article supplement (PMC4356220)
Supplement: Supp_Figure1.pdf [file Supp_Figure1.pdf]

## Supplementary Data

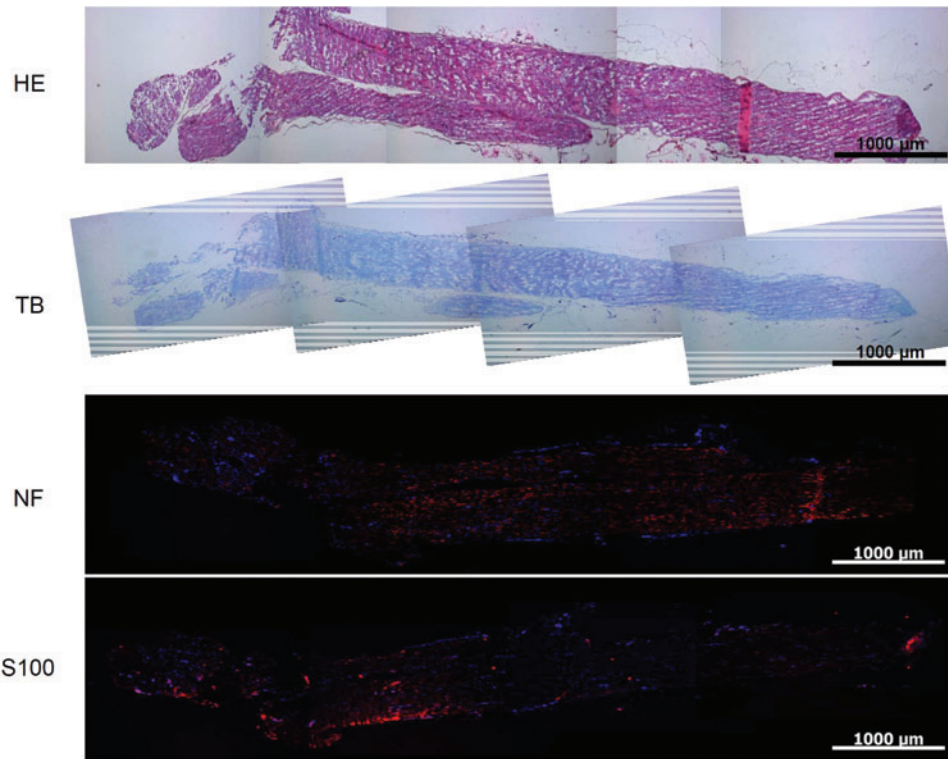

**SUPPLEMENTARY FIG. S1.** H&E, TB, NF, and S100 staining of normal sciatic nerve. H&E, Hematoxylin and Eosin; NF, neurofilament; TB, Toluidine Blue.
