# Supplementary material
Source: PubMed Central journal article supplement (PMC4356220)
Supplement: Supp_Figure2.pdf [file Supp_Figure2.pdf]

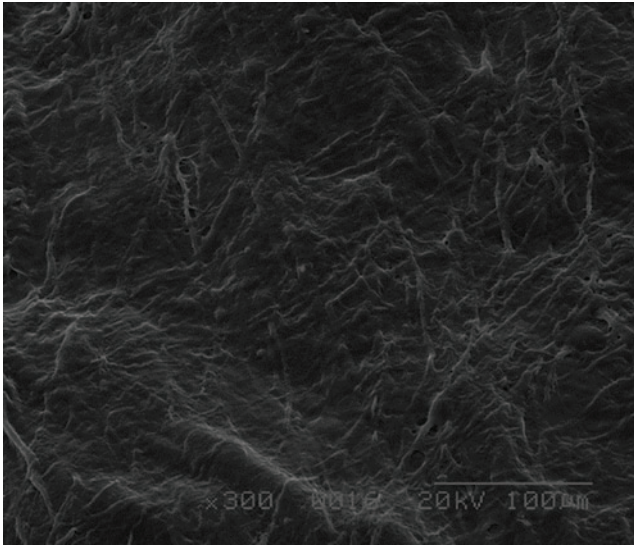

**SUPPLEMENTARY FIG. S2.** Scanning electron microscopy image of SIS surface (Magnification: 300 $\times$  and scale bars: 100  $\mu$ m). SIS, small intestine submucosa.
