# Supplementary material
Source: PubMed Central journal article supplement (PMC4356220)
Supplement: Supp_Figure3.pdf [file Supp_Figure3.pdf]

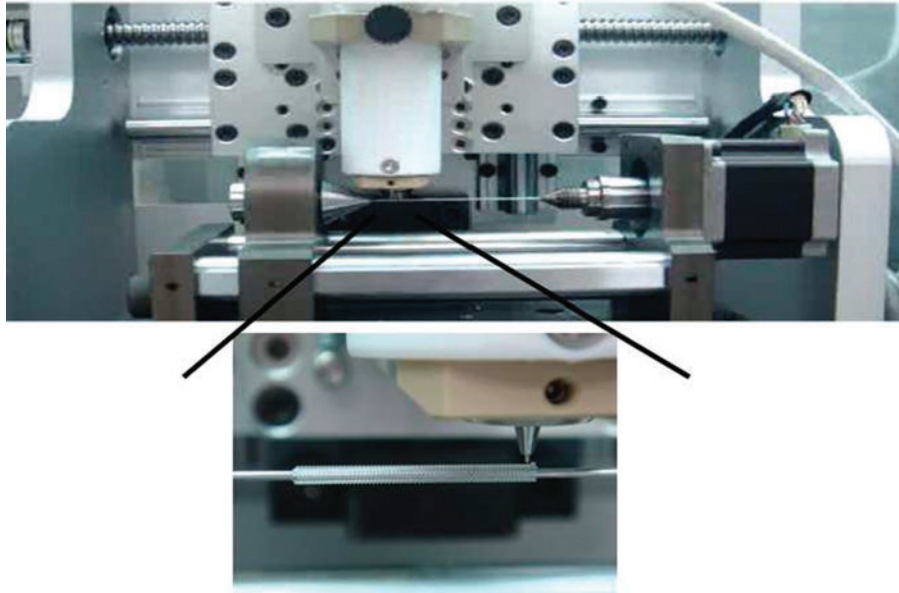

**SUPPLEMENTARY FIG. S3.** Manufacturing of PCLA-NGC using 3D-bioplotter. NGC, nerve guidance conduit; PCLA, poly(caprolactone-co-lactide).
