# Supplementary material
Source: PubMed Central journal article supplement (PMC4356220)
Supplement: Supp_Figure4.pdf [file Supp_Figure4.pdf]

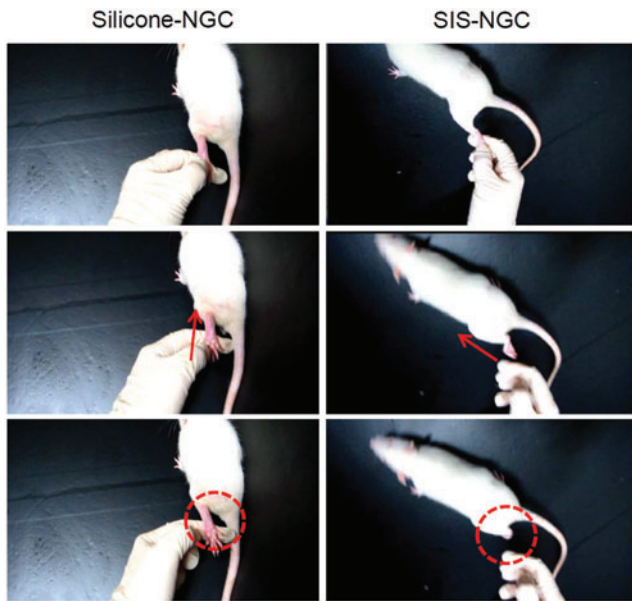

**SUPPLEMENTARY FIG. S4.** Movement of silicone-NGC and SIS-NGC-implanted peripheral nerve injury animals at 4 weeks.
