# Supplementary material
Source: PubMed Central journal article supplement (PMC4356220)
Supplement: Supp_Figure5.pdf [file Supp_Figure5.pdf]

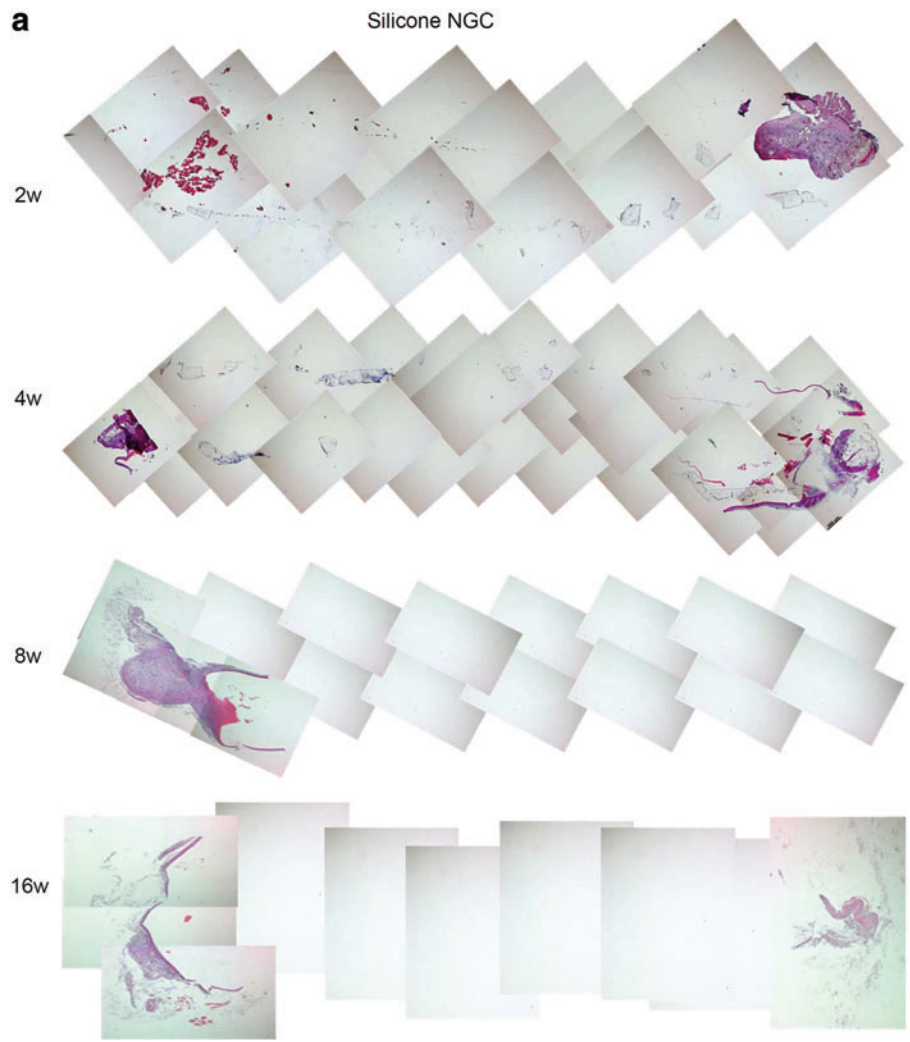

**SUPPLEMENTARY FIG. S5.** (a) Enlarged H&E staining of silicone-NGCs at 2–16 weeks after *in vivo* implantation. (b) Enlarged H&E staining of SIS-NGCs at 2–16 weeks after *in vivo* implantation. (c) Enlarged H&E staining of PLGC-NGCs at 2–16 weeks after *in vivo* implantation.

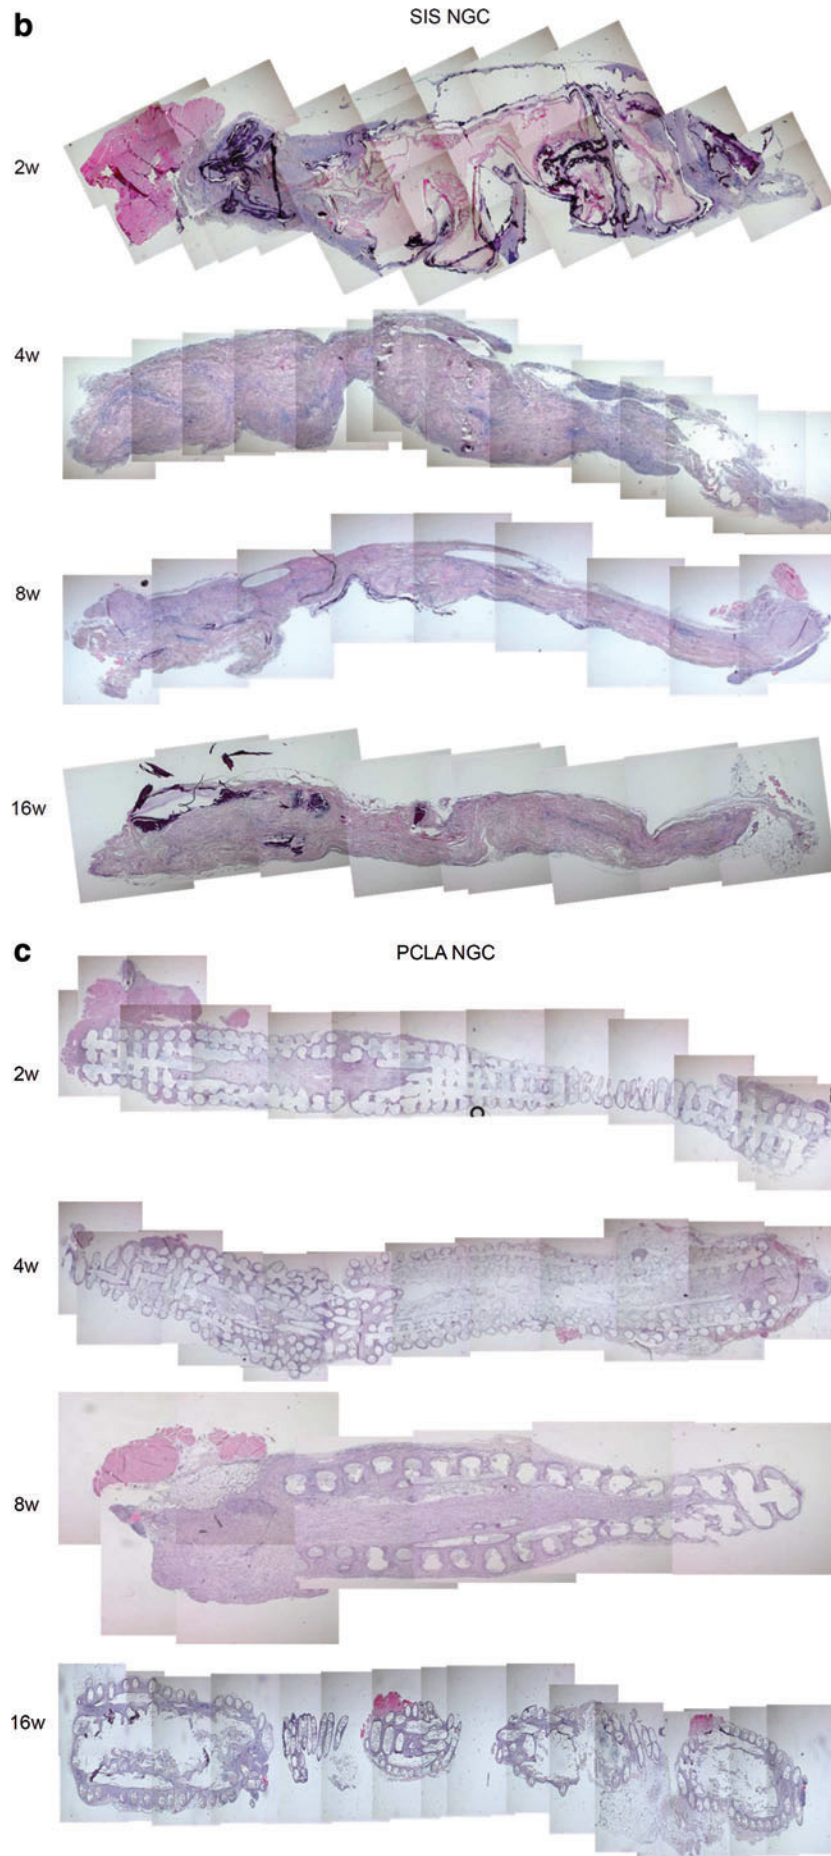

**SUPPLEMENTARY FIG. S5.** (Continued).
