# Supplementary material
Source: PubMed Central journal article supplement (PMC4356220)
Supplement: Supp_Figure7-10.pdf [file Supp_Figure7-10.pdf]

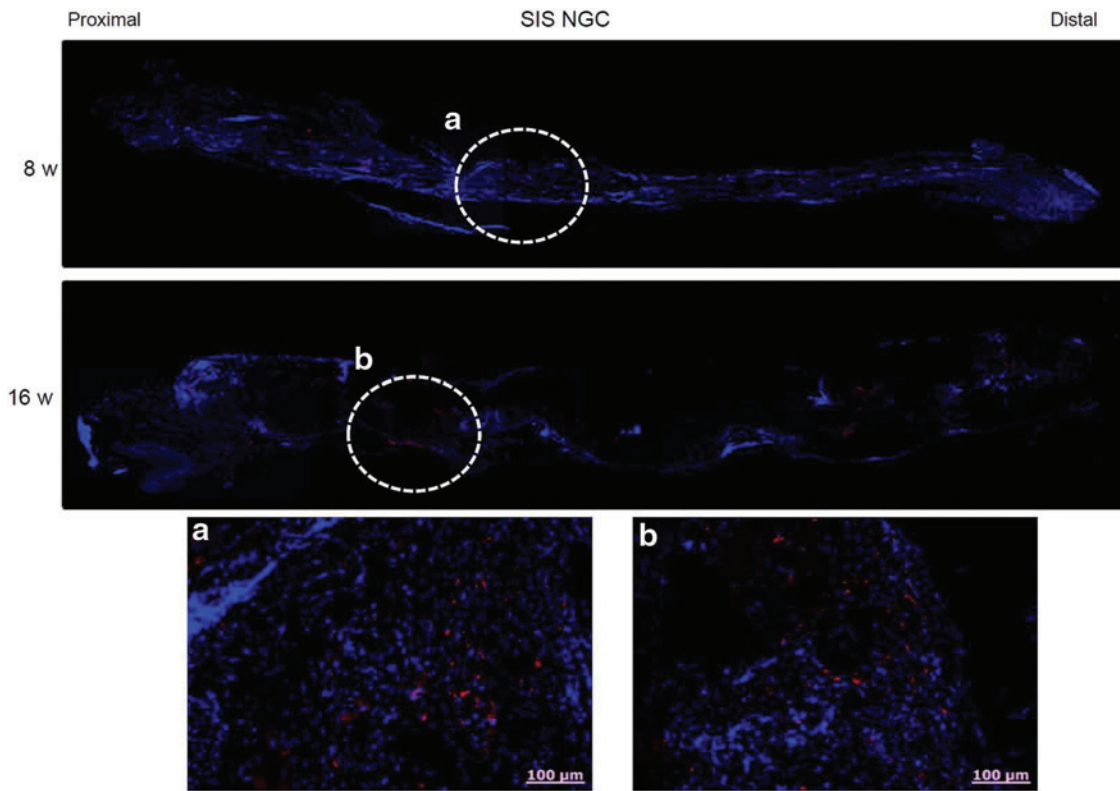

**SUPPLEMENTARY FIG. S7.** NF staining of SIS-NGCs at 8 and 16 weeks after *in vivo* implantation (**a**, **b**: enlarged staining images).

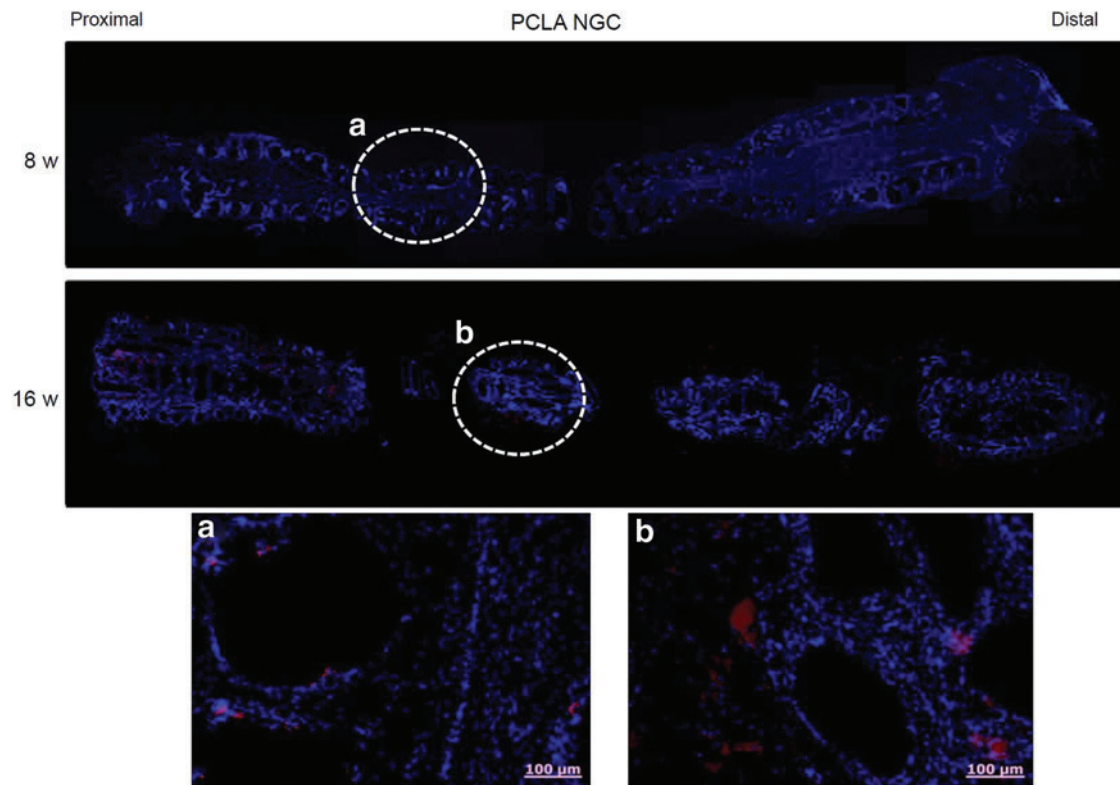

**SUPPLEMENTARY FIG. S8.** NF staining of PLGC-NGCs at 8 and 16 weeks after *in vivo* implantation (**a, b**: enlarged staining images).

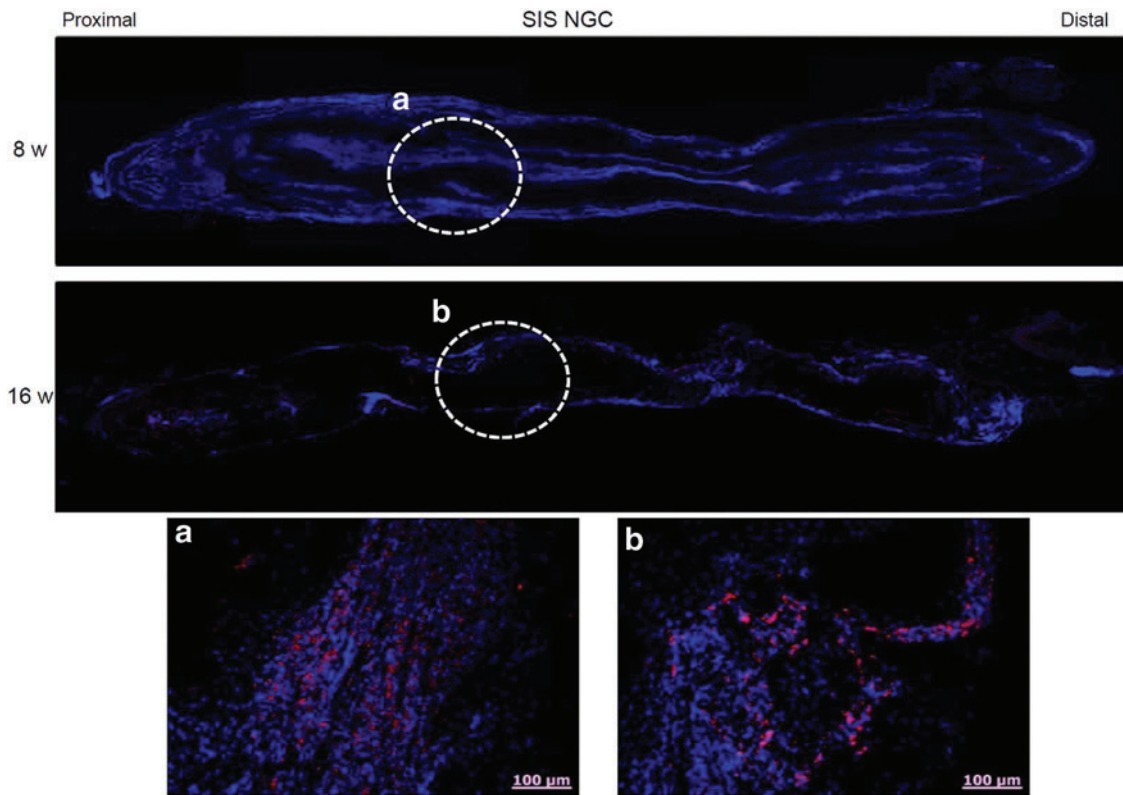

**SUPPLEMENTARY FIG. S9.** S100 staining of SIS-NGCs at 8 and 16 weeks after *in vivo* implantation (**a, b**: enlarged staining images).

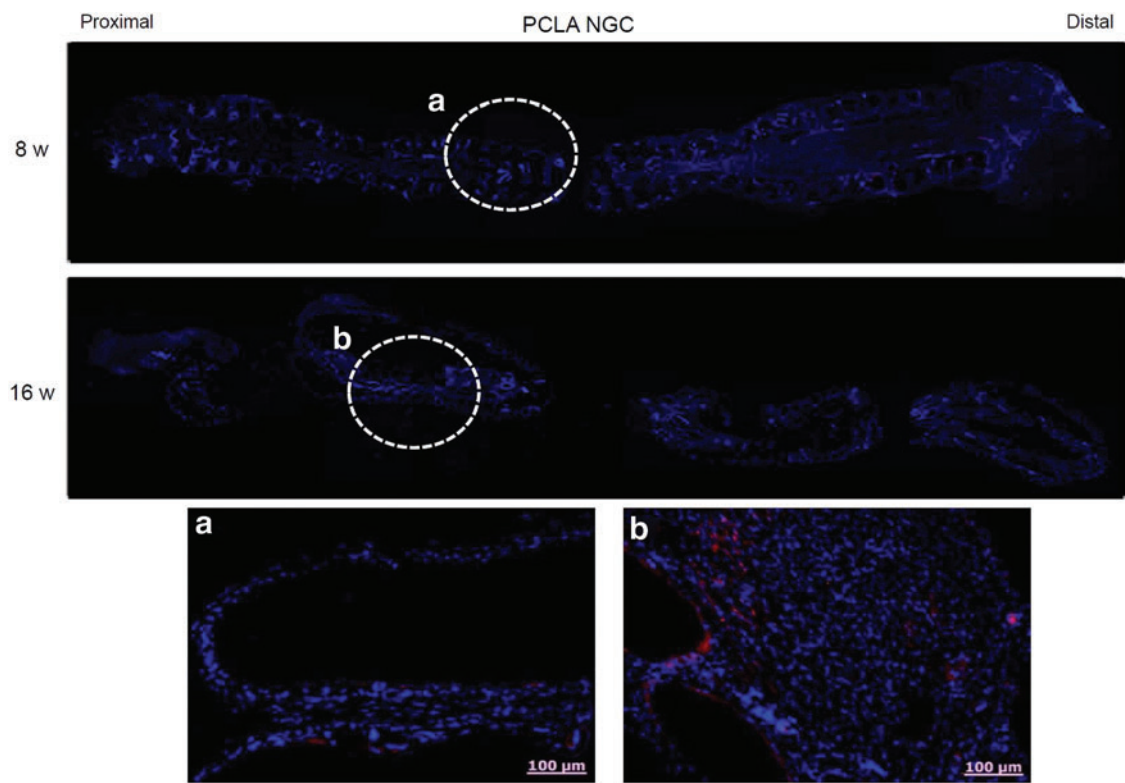

**SUPPLEMENTARY FIG. S10.** S100 staining of PLGC-NGCs at 8 and 16 weeks after *in vivo* implantation (**a, b**: enlarged staining images).
