# Supplementary material
Source: PubMed Central journal article supplement (PMC4356220)

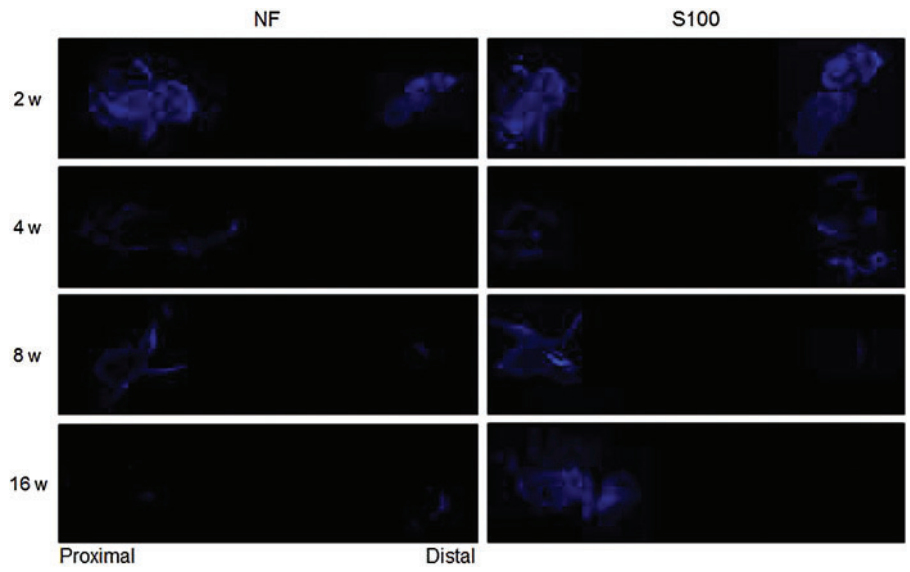

**SUPPLEMENTARY FIG. S6.** NF and S100 staining of silicone-NGCs at 2–16 weeks after *in vivo* implantation.

Supplement: Supp_Figure6.pdf [file Supp_Figure6.pdf]
